# Supplementary material for: Clinical and neuropathological phenotype associated with the novel V189I mutation in the prion protein gene
Source: PubMed Central journal article supplement (PMC6317215; doi:10.1186/s40478-018-0656-4), 2019-01-03
Supplement: 40478_2018_656_MOESM1_ESM.pdf [file 40478_2018_656_MOESM1_ESM.pdf]

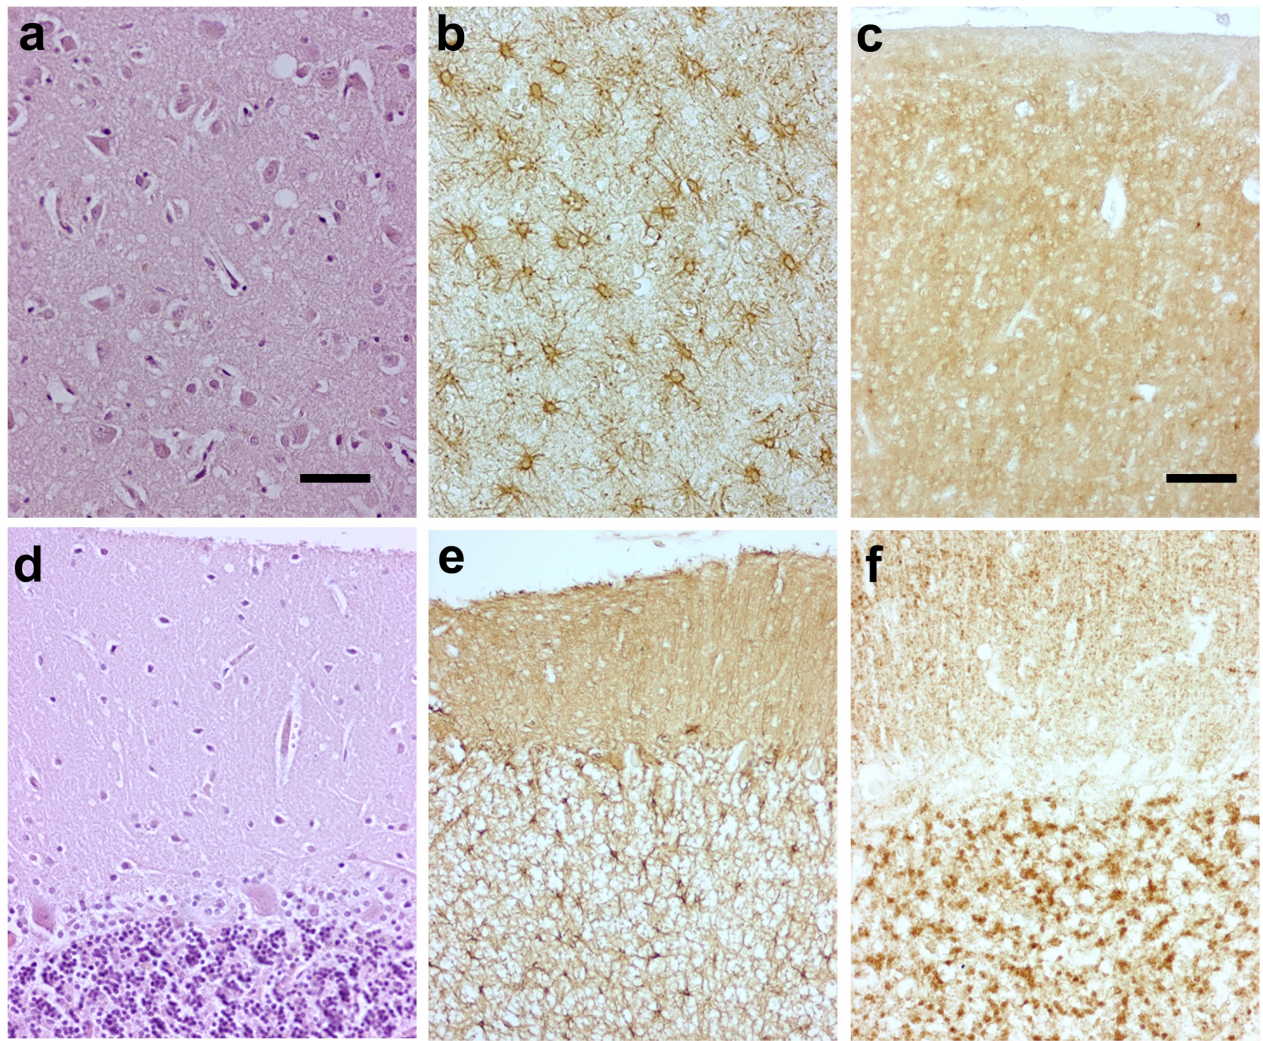

**Fig. S1** Neuropathology of case 3. The neuropathologic study on brain sample from case 3 showed findings overlapping those found in case 1 and 4. Severe neuronal loss and spongiform changes (**a**: frontal cortex, Haematoxylin-Eosin) associated with astrogliosis (**b**: frontal cortex, GFAP immunostaining) were observed in cerebral cortex. The pattern of PrP<sup>Sc</sup> deposition was the same of cases 1 and 4, and consisted of diffuse, synaptic-like immunoreactivity (**c**: 3F4 immunostaining, frontal cortex). Similar changes were found in cerebellum: loss of Purkinje cells and spongiosis in the molecular layer (**d**: Haematoxylin-Eosin), diffuse astrogliosis in the granular layer (**e**: GFAP immunostaining) and finely granular PrP deposits in the molecular layer (**f**: 3F4 immunostaining). As in the other cases carrying the V189I mutation, coarse spots of PrP immunostaining were evident in the granular layer (**f**: 3F4 immunostaining).

Scale bars: in **(a)** = 100  $\mu\text{m}$  (**a**, **b**, **d** and **f** are the same magnification); in **(c)** = 50  $\mu\text{m}$  (**c** and **e** are the same magnification).
